# Supplementary material for: Impact of Bacillus spp. spores and gentamicin on the gastrointestinal microbiota of suckling and newly weaned piglets
Source: PubMed Central journal article supplement (PMC6258502; doi:10.1371/journal.pone.0207382), 2018-11-27

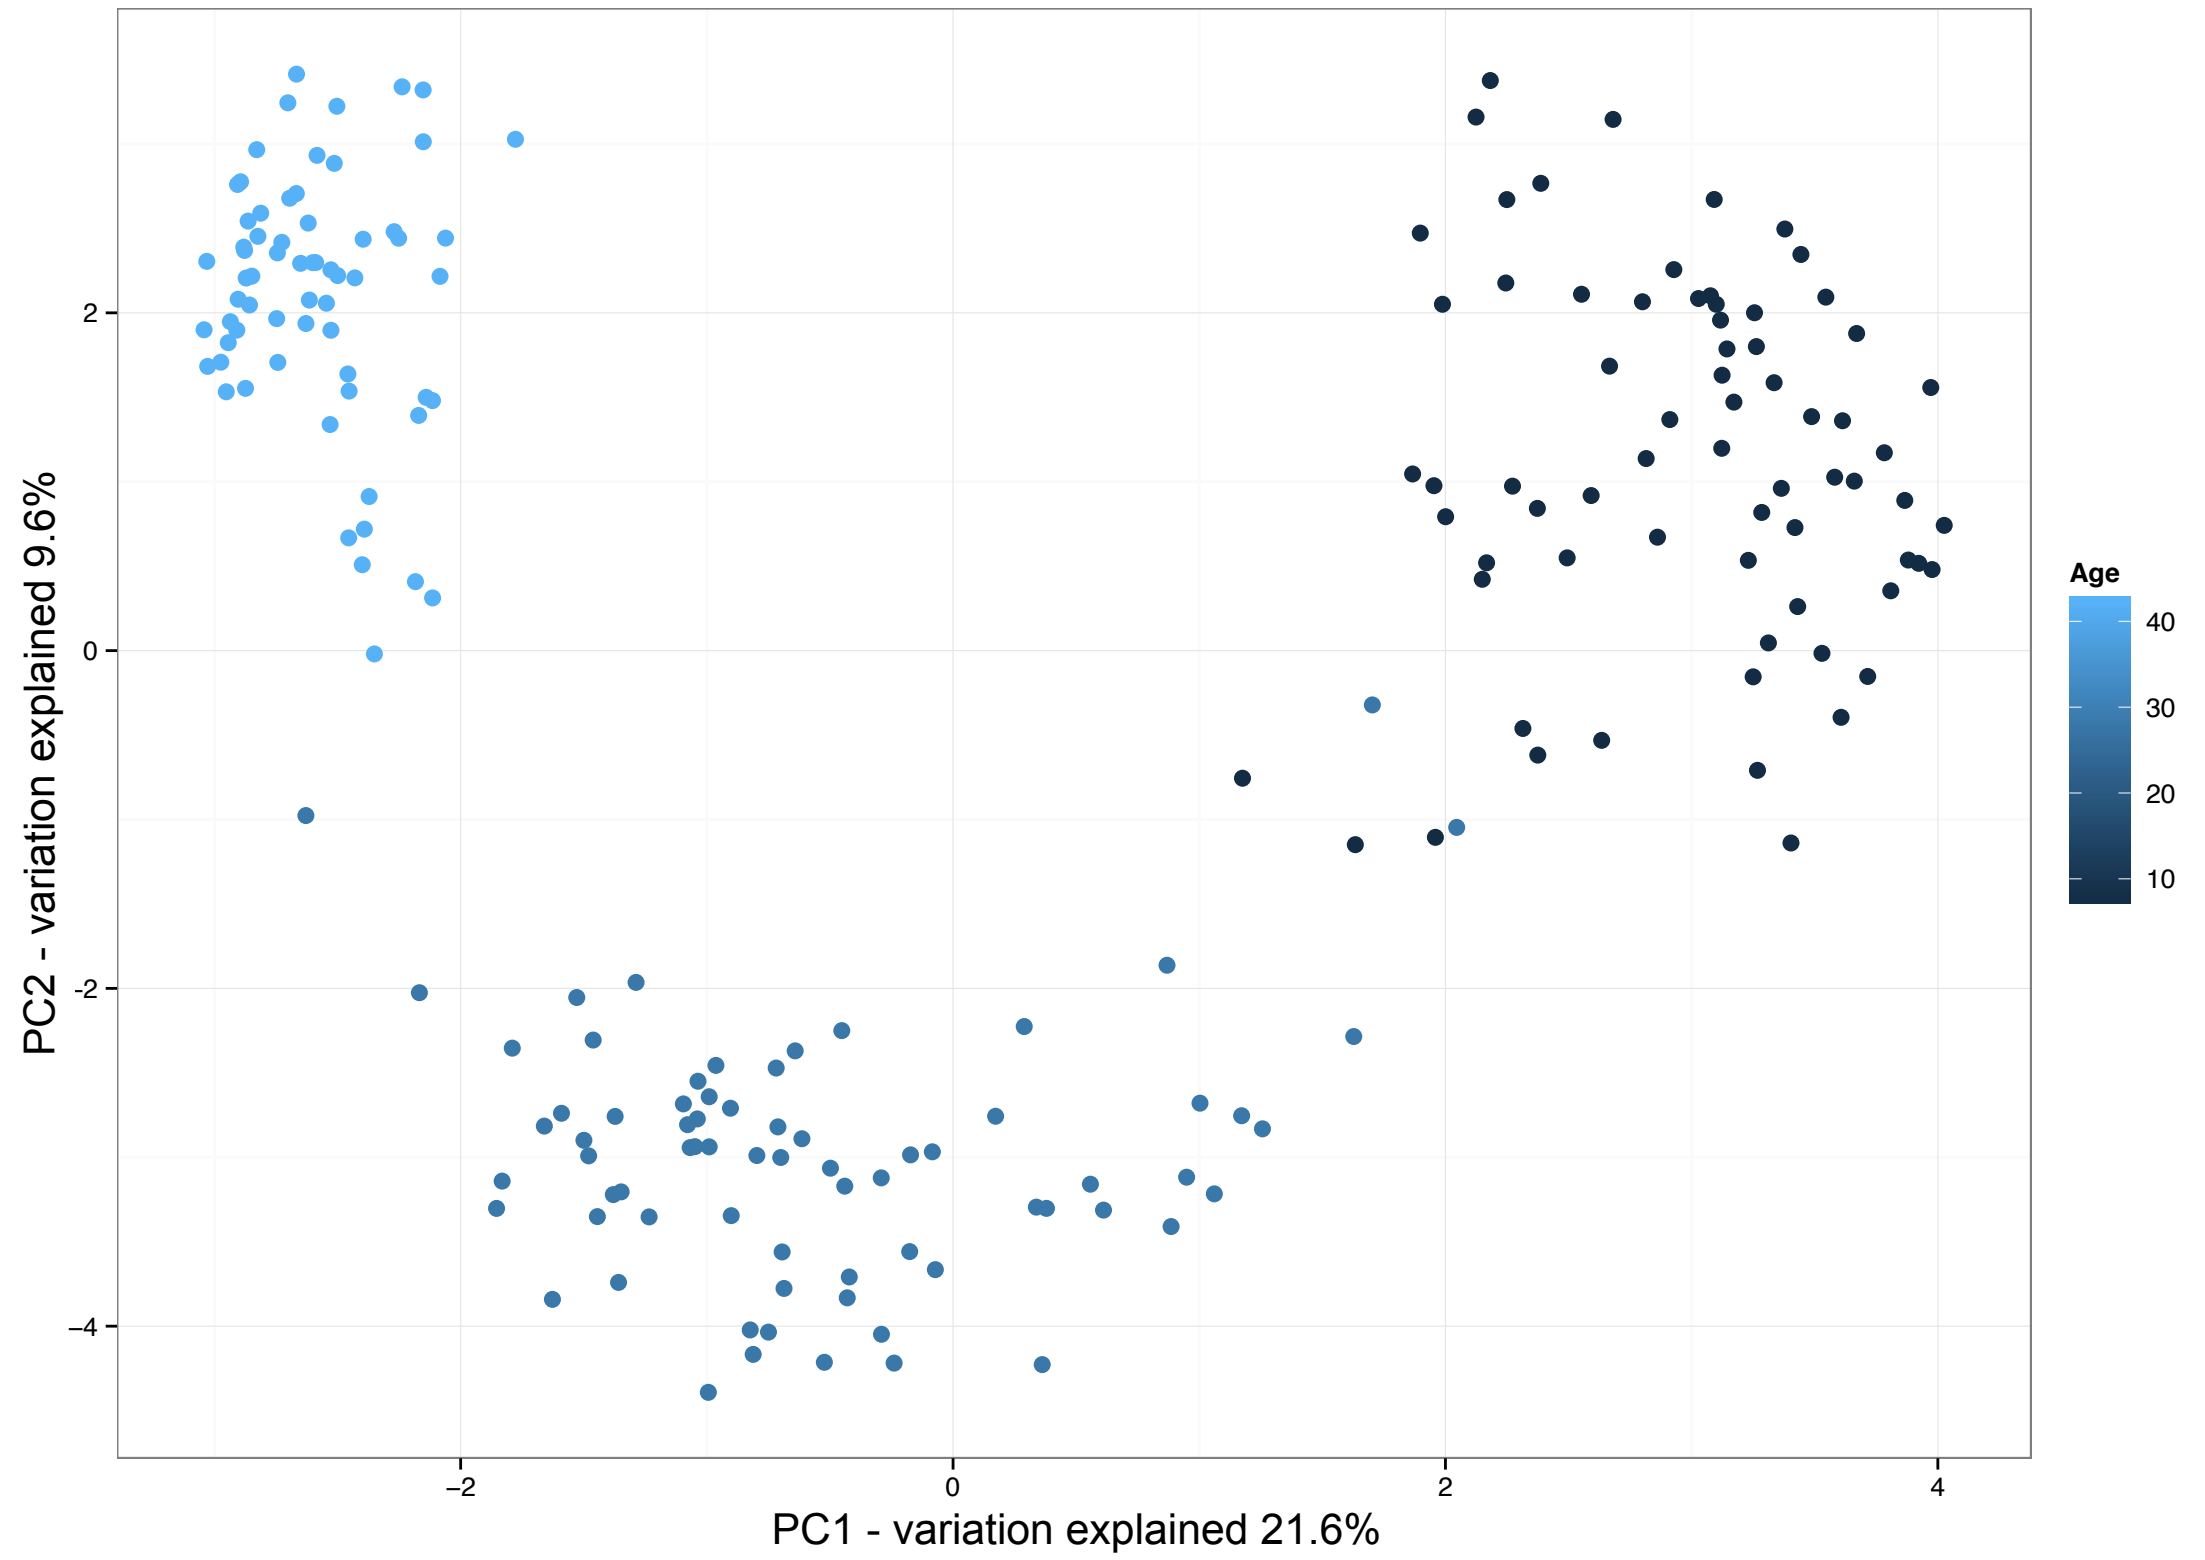

Supplement: pone.0207382.s006.pdf [file pone.0207382.s006.pdf]
